# Supplementary material for: The isolation and chemistry of tantalum dimethylamides containing resolved 3,3′-disubstituted-1,1′-bi-2,2′-naphthoxide ligandsElectronic supplementary information (ESI) available: ORTEP views of (R)-7, (R,S)-8, (S)-9 and (S)-12. See http://www.rsc.org/suppdata/dt/b2/b212910h/
Source: Royal Society of Chemistry journal article supplement (doi:10.1039/b212910h), 2003-03-10

Supplementary Material (ESI) for Dalton Transactions  
This journal is © The Royal Society of Chemistry 2003

Electronic Supplementary Information for

**The Isolation and Chemistry of Tantalum Dimethylamides  
Containing Resolved 3,3'-Disubstituted-1,1'-Bi-2,2'-  
Naphthoxide Ligands.**

Au Ji Ru Son, Scott W. Schweiger, Matt G. Thorn, John E. Moses, Phillip E. Fanwick  
and Ian P. Rothwell\*

Purdue University  
Department of Chemistry  
560 Oval Drive  
West Lafayette  
IN 47907-2038, USA

\* E-mail: [rothwell@purdue.edu](mailto:rothwell@purdue.edu)



ORTEP view of  $[\text{Ta}(\text{O}_2\text{C}_{20}\text{H}_{10}\{\text{SiPh}_3\}_{2-3,3'})\text{(NHMe}_2\text{)(NMe}_2\text{)}_3]$  (*R,S*)-**8**.

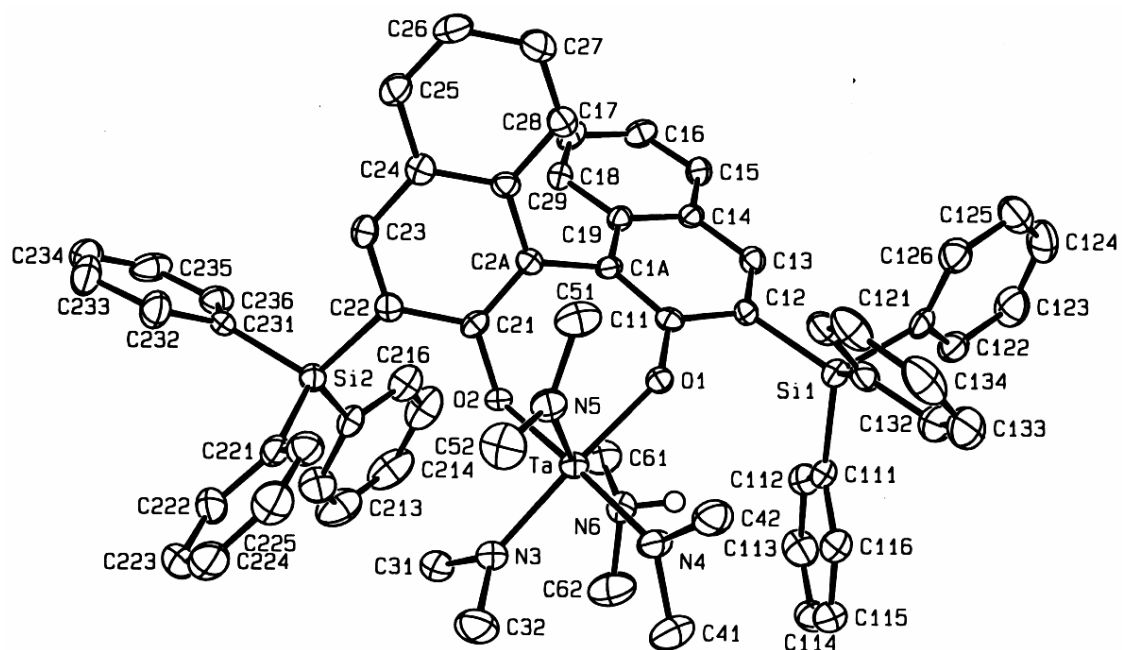

ORTEP view of [Ta(O<sub>2</sub>C<sub>20</sub>H<sub>10</sub>{SiMe<sub>3</sub>}<sub>2-3,3'</sub>)(NHMe<sub>2</sub>)(NMe<sub>2</sub>)Cl<sub>2</sub>] (*S*)-**9**.

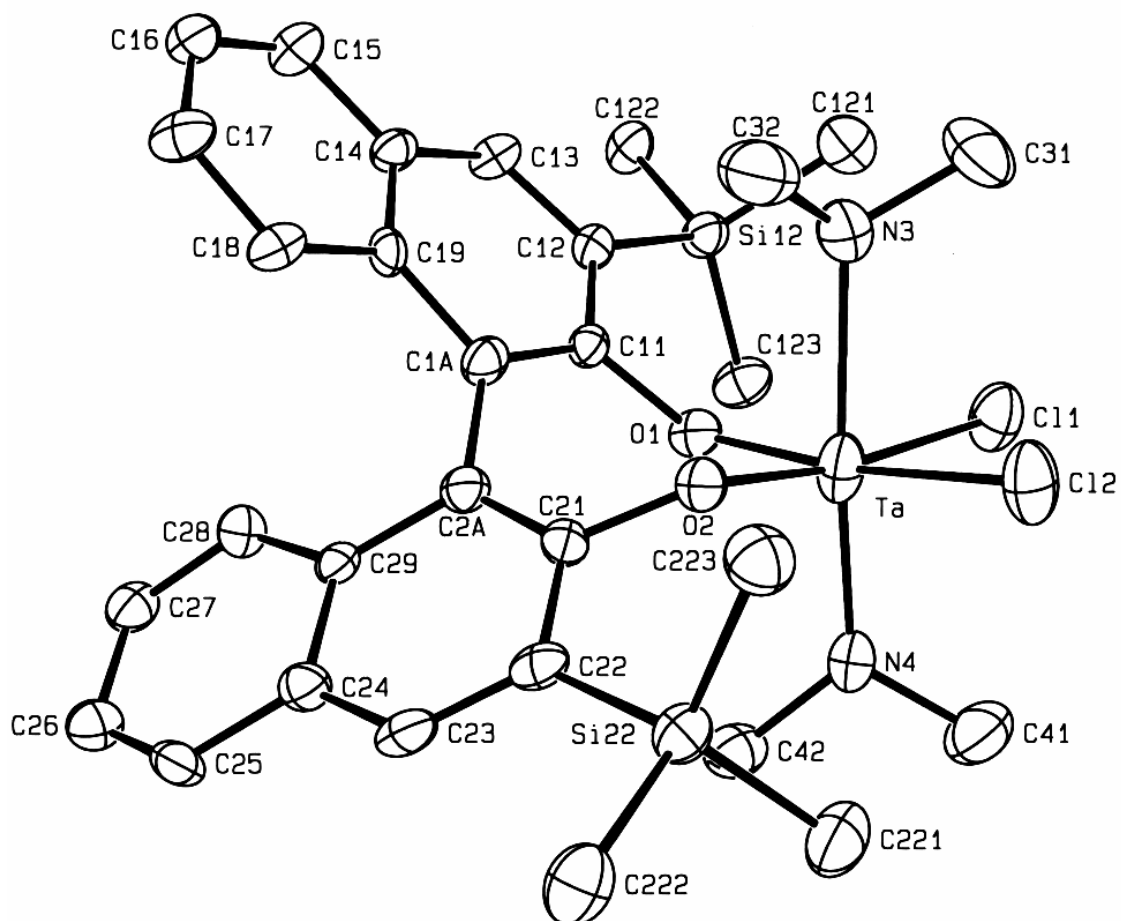

ORTEP view of  $[\text{Ta}(\text{O}_2\text{C}_2\text{O}_2\text{H}_{10}\{\text{SiPh}_3\}_{2-3,3'})\text{(NHMe}_2\text{)(NMe}_2\text{)Cl}_2]$  (*S*)-**12**.

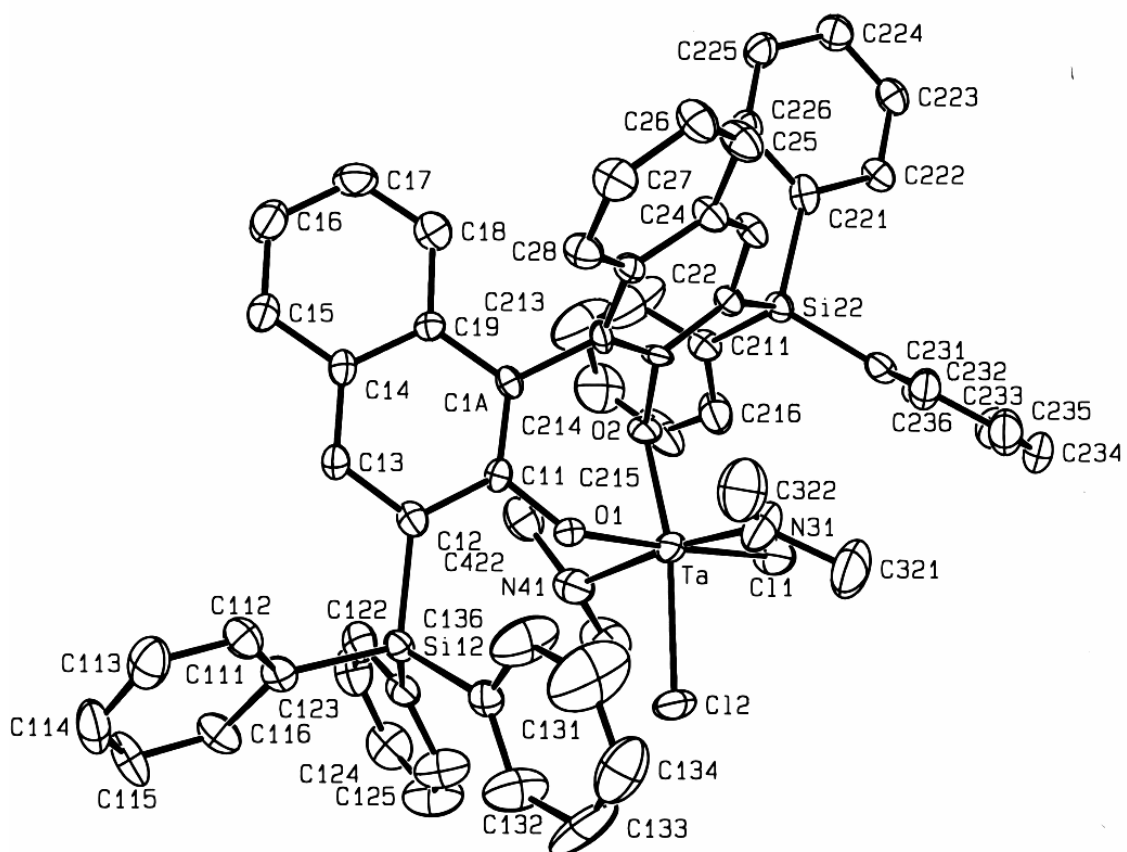

Supplement: b212910h.pdf [file b212910h.pdf]
